# Supplementary material for: Pan-Canadian Analysis of Practice Patterns in Small Cell Carcinoma of the Cervix: Insights from a Multidisciplinary Survey
Source: MDPI journal article supplement (doi:10.3390/curroncol31050196), 2024-05-03

**Figure S1:** Indications for brain imaging in the initial staging of SCNECC. Abbreviations: Mets (metastases)

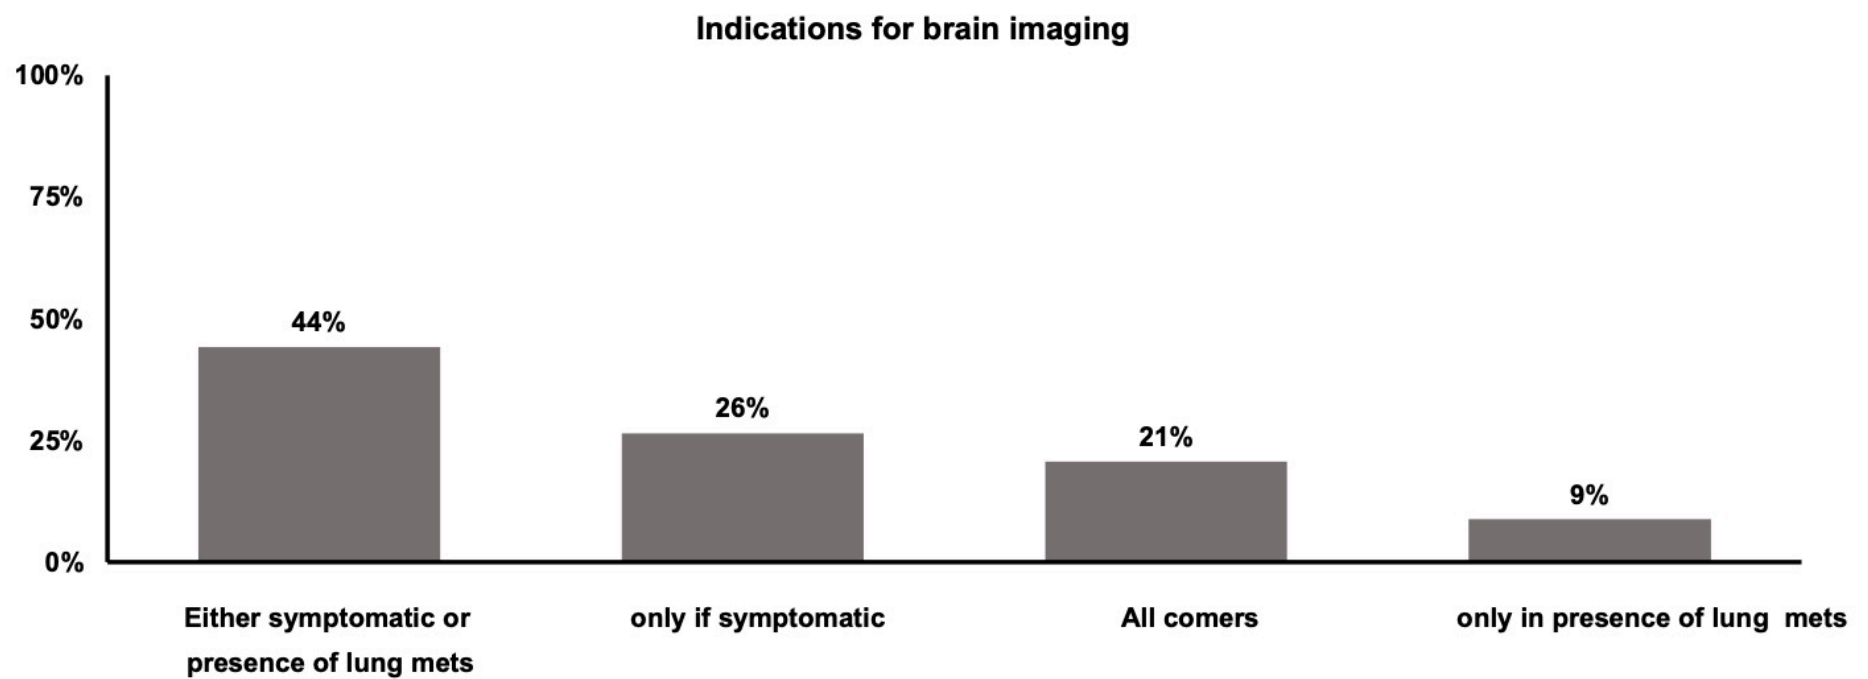

Supplement: s1 [file s1]
