# Supplementary material for: Pan-Canadian Analysis of Practice Patterns in Small Cell Carcinoma of the Cervix: Insights from a Multidisciplinary Survey
Source: MDPI journal article supplement (doi:10.3390/curroncol31050196), 2024-05-03

**Figure S2:** Practice patterns in the treatment of SCNECC with local relapse (A) and regional nodal relapse (B).  
Abbreviations: NAC ( neoadjuvant chemotherapy), + (followed by), C (chemotherapy), RT (radiotherapy)

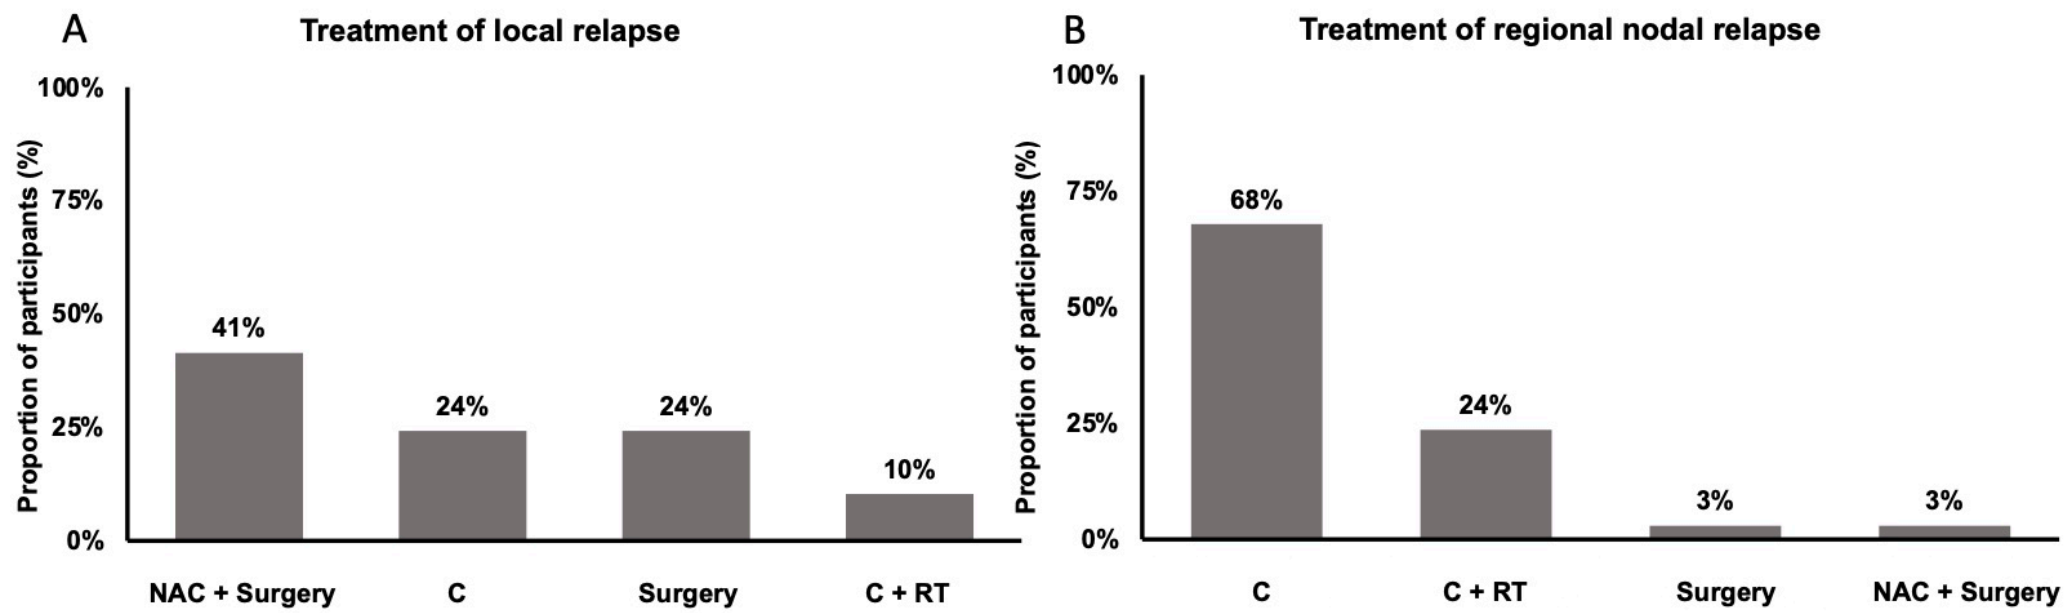

Supplement: s1 [file s1]
