# Supplementary material for: Pan-Canadian Analysis of Practice Patterns in Small Cell Carcinoma of the Cervix: Insights from a Multidisciplinary Survey
Source: MDPI journal article supplement (doi:10.3390/curroncol31050196), 2024-05-03

**Figure S3:** Practice patterns in the surveillance of patients with SCNECC after curative intent treatment.  
Abbreviations: H+P (history and physical examination), q (every), CT (CT chest, abdomen and pelvis), PET (18-FDG-PET/CT; positron emission tomography), MRI (magnetic resonance imaging)

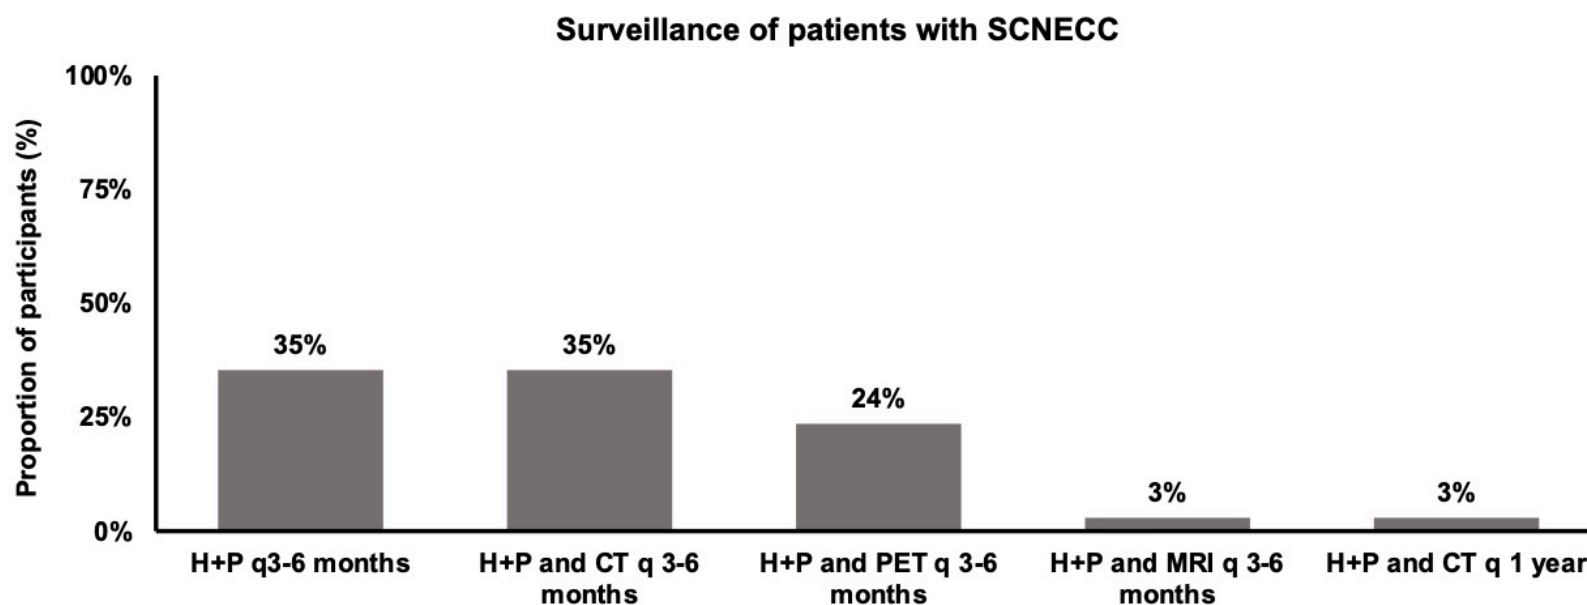

Supplement: s1 [file s1]
