# Supplementary material for: Pan-Canadian Analysis of Practice Patterns in Small Cell Carcinoma of the Cervix: Insights from a Multidisciplinary Survey
Source: Curr Oncol. 2024 May 3;31(5):2610–9. doi: 10.3390/curroncol31050196 (PMC11119600; doi:10.3390/curroncol31050196)
Supplement: Supplementary file 1 [file curroncol-31-00196-s001.zip]

Archive with 5 entries (5 files):
- Figure S1 Jan 20.pdf
- Figure S2 Jan 20.pdf
- Figure S3 Jan 20.pdf
- S4 SCNECC Survey.pdf
- Supplementary Material S5.xlsx
