# Supplementary material for: Pan-Canadian Analysis of Practice Patterns in Small Cell Carcinoma of the Cervix: Insights from a Multidisciplinary Survey
Source: Curr Oncol. 2024 May 3;31(5):2610–9. doi: 10.3390/curroncol31050196 (PMC11119600; doi:10.3390/curroncol31050196)
Supplement: Supplementary file 1 [file curroncol-31-00196-s001.zip › Supplementary Material S5.xlsx]

## Sheet: Sheet1
On average, how many patients with small cell carcinoma of the cervix (SCCC) are treated annually at your centre?	Please confirm your state/province of practice	Do practice at an academic institution?	Does your centre have the following services (please check all that apply)?			At your centre, primarily which specialty delivers systemic therapy for SCCC?	What is your primary specialty?		For how many years have you been in practice?	At your centre, what clinical and imaging modalities do you use for staging SCCC patients? (select up to 3)							Do you routinely obtain brain imaging?	At your centre which molecular markers are typically obtained? (select all that apply)											What is the typical treatment regimen at your Centre for patients with early stage SCCC (stage 1A1-1B2)?											What is the typical treatment regimen at your centre for patients with locally advanced nonmetastatic SCCC (stage 1B3-IVA)?
Response	Open-Ended Response	Response	Gynecologic oncologic surgery sub-specialty services	Radiation oncology services	Medical oncology services	Response	Response	Other (please specify)	Response	MRI pelvis	CT scan (chest abdomen pelvis)	CT pelvis only	PET	EUA with sigmoidoscopy and cystoscopy	None	Other (please specify)	Response	P16	HPV	Chromogranin	Synaptophysin	P53	PDL1	MMR	NGS panel	NSE	CD56	Other (please specify)	Surgical resection only	Surgery followed by adjuvant chemotherapy	Neoadjuvant chemotherapy followed by surgical resection only	Neoadjuvant chemotherapy followed by surgery ± radiation (EBRT ± brachytherapy)	Neoadjuvant chemotherapy followed by radiation (EBRT ± brachytherapy)	Concurrent chemoradiotherapy (+ brachytherapy) only	Concurrent chemoradiotherapy (+ brachytherapy) followed by adjuvant chemotherapy	N/A (select this if you rarely use an alternative regimen)	N/A (select this if you rarely use an alternative regimen)	N/A (select this if you rarely use an alternative regimen)	Other (please specify)	Surgical resection only	Surgery followed by adjuvant chemotherapy	Neoadjuvant chemotherapy followed by surgical resection only	Neoadjuvant chemotherapy followed by surgery ± radiation (EBRT ± brachytherapy)	Neoadjuvant chemotherapy followed by radiation (EBRT ± brachytherapy)	Concurrent chemoradiotherapy (+ brachytherapy) only	Concurrent chemoradiotherapy (+ brachytherapy) followed by adjuvant chemotherapy	N/A (select this if you rarely use an alternative regimen)	N/A (select this if you rarely use an alternative regimen)	Other (please specify)
1-4	Alberta	Yes	Gynecologic oncologic surgery sub-specialty services	Radiation oncology services	Medical oncology services	Gyne Medical Oncologist	Gynecologic Oncology		6-10	MRI pelvis	CT scan (chest abdomen pelvis)		PET				Only if symptoms or lung mets	P16		Chromogranin	Synaptophysin	P53	PDL1	MMR						Most commonly used regimen			Alternative regimen											Most commonly used regimen
1-4	Quebec	Yes	Gynecologic oncologic surgery sub-specialty services	Radiation oncology services	Medical oncology services	Gynecologic Oncologist	Gynecologic Oncology		≥16	MRI pelvis	CT scan (chest abdomen pelvis)		PET				Only if lung mets	P16	HPV	Chromogranin	Synaptophysin	P53	PDL1	MMR						Most commonly used regimen														Most commonly used regimen
1-4	Alberta	Yes	Gynecologic oncologic surgery sub-specialty services	Radiation oncology services	Medical oncology services	Gynecologic Oncologist	Gynecologic Oncology		11-15	MRI pelvis	CT scan (chest abdomen pelvis)		PET				Only if symptoms	P16	HPV	Chromogranin	Synaptophysin	P53	PDL1	MMR	NGS panel	NSE	CD56	I think all			Most commonly used regimen															Most commonly used regimen
1-4	Quebec	Yes	Gynecologic oncologic surgery sub-specialty services	Radiation oncology services	Medical oncology services	Gynecologic Oncologist	Gynecologic Oncology		≤5	MRI pelvis	CT scan (chest abdomen pelvis)		PET			Head CT	For everyone	P16		Chromogranin	Synaptophysin	P53	PDL1	MMR															NACT, surgery, then chemoradiation						Most commonly used regimen
1-4	Quebec	No	Gynecologic oncologic surgery sub-specialty services	Radiation oncology services	Medical oncology services	Gynecologic Oncologist	Gynecologic Oncology		11-15	MRI pelvis			PET			Brain scan	Only if symptoms or lung mets	P16	HPV			P53		MMR						Most commonly used regimen									Surgery followed by chemoradiation						Most commonly used regimen	Alternative regimen
1-4	NL	Yes	Gynecologic oncologic surgery sub-specialty services	Radiation oncology services	Medical oncology services	Gynecologic Oncologist	Gynecologic Oncology		≥16	MRI pelvis	CT scan (chest abdomen pelvis)		PET				For everyone	P16	HPV											Most commonly used regimen																Most commonly used regimen
1-4	BC	Yes	Gynecologic oncologic surgery sub-specialty services	Radiation oncology services	Medical oncology services	Gyne Medical Oncologist	Radiation Oncology		6-10	MRI pelvis			PET				Only if symptoms or lung mets	P16		Chromogranin	Synaptophysin	P53				NSE				Most commonly used regimen		Alternative regimen			Another alternative regimen									Alternative regimen	Another alternative regimen	Most commonly used regimen
1-4	BC	Yes	Gynecologic oncologic surgery sub-specialty services	Radiation oncology services	Medical oncology services	Gyne Medical Oncologist	Radiation Oncology		≥16	MRI pelvis	CT scan (chest abdomen pelvis)		PET				Only if lung mets	P16		Chromogranin	Synaptophysin	P53		MMR												Most commonly used regimen			Neoadj the concurrent xrt + bt								Most commonly used regimen		Neoadj then concurrent xrt+ brachy
1-4	ON	Yes	Gynecologic oncologic surgery sub-specialty services	Radiation oncology services	Medical oncology services	Gynecologic Oncologist	Gynecologic Oncology		6-10	MRI pelvis	CT scan (chest abdomen pelvis)		PET				Only if symptoms or lung mets	P16		Chromogranin	Synaptophysin	P53	PDL1							Another alternative regimen	Alternative regimen	Most commonly used regimen										Another alternative regimen	Most commonly used regimen	Alternative regimen
1-4	AB	Yes	Gynecologic oncologic surgery sub-specialty services	Radiation oncology services	Medical oncology services	Gyne Medical Oncologist	Radiation Oncology		11-15	MRI pelvis			PET				Only if symptoms or lung mets	P16		Chromogranin	Synaptophysin									Alternative regimen				Most commonly used regimen		Another alternative regimen									Most commonly used regimen		Alternative regimen	Another alternative regimen
1-4	Manitoba	Yes	Gynecologic oncologic surgery sub-specialty services	Radiation oncology services	Medical oncology services	Gynecologic Oncologist	Radiation Oncology		11-15	MRI pelvis	CT scan (chest abdomen pelvis)		PET				For everyone	P16	HPV	Chromogranin	Synaptophysin	P53										Most commonly used regimen											Most commonly used regimen
1-4	Ontario	Yes	Gynecologic oncologic surgery sub-specialty services	Radiation oncology services	Medical oncology services	Gyne Medical Oncologist	Medical Oncology		11-15	MRI pelvis	CT scan (chest abdomen pelvis)		PET				Only if symptoms	P16	HPV		Synaptophysin									Alternative regimen	Most commonly used regimen													Alternative regimen		Most commonly used regimen
5-10	Ontario	Yes	Gynecologic oncologic surgery sub-specialty services	Radiation oncology services	Medical oncology services	Gyne Medical Oncologist	Medical Oncology		≥16	MRI pelvis	CT scan (chest abdomen pelvis)		PET				Only if symptoms	P16	HPV	Chromogranin	Synaptophysin	P53	PDL1							Alternative regimen					Most commonly used regimen											Most commonly used regimen		Alternative regimen
1-4	BC	Yes		Radiation oncology services	Medical oncology services	Gyne Medical Oncologist	Radiation Oncology		6-10	MRI pelvis	CT scan (chest abdomen pelvis)		PET				Only if symptoms		HPV		Synaptophysin													Alternative regimen												Most commonly used regimen
1-4	NL	Yes	Gynecologic oncologic surgery sub-specialty services	Radiation oncology services	Medical oncology services	Gynecologic Oncologist	Radiation Oncology		11-15	MRI pelvis	CT scan (chest abdomen pelvis)		PET				Only if symptoms or lung mets	P16	HPV	Chromogranin	Synaptophysin	P53		MMR			CD56			Most commonly used regimen																			Neoadjuvant chemo followed by CCRT (VMAT + HDR)
1-4	Nova Scotia	Yes	Gynecologic oncologic surgery sub-specialty services	Radiation oncology services	Medical oncology services	Gynecologic Oncologist	Gynecologic Oncology		≤5	MRI pelvis	CT scan (chest abdomen pelvis)		PET				Only if symptoms	P16	HPV	Chromogranin	Synaptophysin	P53	PDL1	MMR		NSE	CD56	NSE, CD56 if not clear SCC or AC cervix		Most commonly used regimen																			Haven't encountered this in practice
1-4	Ontario	No	Gynecologic oncologic surgery sub-specialty services	Radiation oncology services	Medical oncology services	Gyne Medical Oncologist	Medical Oncology		≤5	MRI pelvis	CT scan (chest abdomen pelvis)		PET				For everyone	P16	HPV	Chromogranin	Synaptophysin	P53	PDL1							Another alternative regimen		Most commonly used regimen			Alternative regimen								Most commonly used regimen	Alternative regimen		Another alternative regimen
1-4	Manitoba	Yes	Gynecologic oncologic surgery sub-specialty services	Radiation oncology services	Medical oncology services	Gynecologic Oncologist	Gynecologic Oncology		≤5	MRI pelvis	CT scan (chest abdomen pelvis)		PET				For everyone	P16		Chromogranin	Synaptophysin	P53	PDL1	MMR							Alternative regimen	Most commonly used regimen		Another alternative regimen									Most commonly used regimen	Alternative regimen
0	ONtario	Yes	Gynecologic oncologic surgery sub-specialty services	Radiation oncology services	Medical oncology services	Gyne Medical Oncologist	Radiation Oncology		≤5	MRI pelvis	CT scan (chest abdomen pelvis)		PET				Only if symptoms or lung mets	P16																		Most commonly used regimen											Most commonly used regimen
1-4	Sk	Yes	Gynecologic oncologic surgery sub-specialty services	Radiation oncology services		Gynecologic Oncologist	Gynecologic Oncology		11-15	MRI pelvis	CT scan (chest abdomen pelvis)		PET				Only if symptoms	P16		Chromogranin	Synaptophysin														Most commonly used regimen											Most commonly used regimen			Surgery considered individual cases
1-4	Quebec	Yes	Gynecologic oncologic surgery sub-specialty services	Radiation oncology services	Medical oncology services	Gynecologic Oncologist	Gynecologic Oncology		≥16	MRI pelvis	CT scan (chest abdomen pelvis)		PET				Only if symptoms or lung mets	P16	HPV	Chromogranin	Synaptophysin	P53	PDL1	MMR			CD56			Most commonly used regimen																Most commonly used regimen
>10	Québec	No	Gynecologic oncologic surgery sub-specialty services	Radiation oncology services	Medical oncology services	Gyne Medical Oncologist	Radiation Oncology		≥16	MRI pelvis	CT scan (chest abdomen pelvis)		PET				Only if symptoms or lung mets	P16	HPV			P53	PDL1						Most commonly used regimen					Alternative regimen											Most commonly used regimen	Alternative regimen
1-4	BC	Yes		Radiation oncology services	Medical oncology services	Gyne Medical Oncologist	Medical Oncology		≥16	MRI pelvis	CT scan (chest abdomen pelvis)		PET				For everyone			Chromogranin	Synaptophysin			MMR															I've never seen such a low stage and would need to consult gyne surgery and RO							Most commonly used regimen	Alternative regimen	Another alternative regimen
1-4	British Columbia	Yes	Gynecologic oncologic surgery sub-specialty services	Radiation oncology services	Medical oncology services	Gyne Medical Oncologist	Radiation Oncology		6-10	MRI pelvis	CT scan (chest abdomen pelvis)		PET				Only if symptoms or lung mets	P16	HPV	Chromogranin	Synaptophysin	P53		MMR		NSE	CD56					Most commonly used regimen	Another alternative regimen		Alternative regimen								Another alternative regimen	Most commonly used regimen		Alternative regimen
1-4	nova scotia	Yes	Gynecologic oncologic surgery sub-specialty services	Radiation oncology services	Medical oncology services	Gynecologic Oncologist	Radiation Oncology		≥16	MRI pelvis	CT scan (chest abdomen pelvis)		PET				Only if symptoms or lung mets	P16	HPV	Chromogranin	Synaptophysin	P53	PDL1	MMR	NGS panel	NSE	CD56			Most commonly used regimen														Most commonly used regimen
1-4	Ontario	Yes	Gynecologic oncologic surgery sub-specialty services	Radiation oncology services	Medical oncology services	Gyne Medical Oncologist	Radiation Oncology		≥16	MRI pelvis	CT scan (chest abdomen pelvis)						Only if symptoms or lung mets	P16	HPV			P53				NSE													Concurrent chemoradiotherapy, adjuvant chemotherapy followed by surgery										Same as above
1-4	AB	Yes	Gynecologic oncologic surgery sub-specialty services	Radiation oncology services	Medical oncology services	Gynecologic Oncologist	Radiation Oncology		≥16	MRI pelvis			PET	EUA with sigmoidoscopy and cystoscopy			For everyone	P16		Chromogranin	Synaptophysin	P53	PDL1				CD56			Most commonly used regimen					Alternative regimen				I hope you are asking gyne oncs as this be variable. Sometimes neoadjuvant chemo, surgery, then more chemo depending on pathology results/response (I don't see this option listed)				Most commonly used regimen	Alternative regimen					as above - Sometimes neoadjuvant chemo, surgery or CRT, then more chemo depending on pathology results/response
1-4	Saskatchewan	Yes	Gynecologic oncologic surgery sub-specialty services	Radiation oncology services	Medical oncology services	Gynecologic Oncologist	Radiation Oncology		≤5	MRI pelvis	CT scan (chest abdomen pelvis)		PET				Only if symptoms or lung mets	P16	HPV	Chromogranin	Synaptophysin	P53		MMR				PDL1 if metastatic		Alternative regimen		Most commonly used regimen			Another alternative regimen				concurrent chemoradiothreapy + brachy and adj chemo, if non resectable				Alternative regimen			Most commonly used regimen
1-4	Ontario	Yes	Gynecologic oncologic surgery sub-specialty services	Radiation oncology services	Medical oncology services	Gynecologic Oncologist	Gynecologic Oncology		11-15	MRI pelvis	CT scan (chest abdomen pelvis)						Only if lung mets	P16	HPV	Chromogranin		P53							Alternative regimen	Most commonly used regimen	Another alternative regimen										Most commonly used regimen	Alternative regimen	Another alternative regimen
1-4	BC	Yes	Gynecologic oncologic surgery sub-specialty services	Radiation oncology services	Medical oncology services	Gyne Medical Oncologist	Gynecologic Oncology		11-15	MRI pelvis			PET				Only if symptoms	P16		Chromogranin	Synaptophysin	P53		MMR	NGS panel				Alternative regimen	Most commonly used regimen		Another alternative regimen										Most commonly used regimen	Alternative regimen	Another alternative regimen
1-4	Quebec	No	Gynecologic oncologic surgery sub-specialty services	Radiation oncology services	Medical oncology services	Gyne Medical Oncologist	Gynecologic Oncology		6-10	MRI pelvis			PET				Only if symptoms or lung mets	P16	HPV	Chromogranin	Synaptophysin	P53	PDL1	MMR						Most commonly used regimen																Most commonly used regimen
5-10	alberta	Yes	Gynecologic oncologic surgery sub-specialty services	Radiation oncology services	Medical oncology services	Gynecologic Oncologist	Gynecologic Oncology		≥16	MRI pelvis	CT scan (chest abdomen pelvis)		PET				Only if symptoms	P16	HPV	Chromogranin	Synaptophysin	P53	PDL1	MMR			CD56					Most commonly used regimen											Most commonly used regimen
1-4	Ontario	Yes	Gynecologic oncologic surgery sub-specialty services	Radiation oncology services	Medical oncology services	Gynecologic Oncologist	Gynecologic Oncology		11-15		CT scan (chest abdomen pelvis)						Only if symptoms or lung mets	P16	HPV	Chromogranin	Synaptophysin	P53								Most commonly used regimen													Most commonly used regimen
1-4	Manitoba	Yes	Gynecologic oncologic surgery sub-specialty services	Radiation oncology services	Medical oncology services	Gynecologic Oncologist	Gynecologic Oncology		11-15	MRI pelvis	CT scan (chest abdomen pelvis)						Only if symptoms	P16				P53								Most commonly used regimen		Another alternative regimen	Alternative regimen								Most commonly used regimen
[truncated: 36 more columns]
